# Supplementary material
Source: PubMed Central journal article supplement (PMC10199741)
Supplement: 10985_2023_9602_MOESM1_ESM.pdf [file 10985_2023_9602_MOESM1_ESM.pdf]

# Supplementary Information of “Evaluation of the natural history of disease by combining incident and prevalent cohorts: application to the Nun Study”

In this Supplementary Information, the estimation results of the baseline intensities and the parameters for  $A_0$  for both the simulation studies and the data analysis and the sensitivity analysis when the density of  $\widetilde{W}$  are provided.

Table S1: Simulation results for estimating the baseline intensities with incident cohort data only ( $m_1 = 300$ ) or with the combined cohort ( $m_1 = 300$  and  $m_2 = 300$ ) under different censoring rates for the prevalent cohort. For the results of the combined cohort, the results for the parameters in  $g(w)$  are also provided, where  $g(w) = \eta\kappa t^{\kappa-1} e^{-\eta t^\kappa}$  with  $\eta = 0.5$  and  $\kappa = 1.2$ .

|                                            | $\log \lambda_{01}$ | $\log \lambda_{03}$ | $\log \lambda_{10}$ | $\log \lambda_{12}$ | $\log \lambda_{13}$ | $\log \lambda_{23}$ | $\log \gamma$ | $\log \eta$ | $\log \kappa$ |
|--------------------------------------------|---------------------|---------------------|---------------------|---------------------|---------------------|---------------------|---------------|-------------|---------------|
| Truth                                      | -0.693              | -1.609              | -0.916              | -1.204              | -0.916              | -1.204              | 0.405         | -0.693      | 0.182         |
| <i>Incident cohort only</i>                |                     |                     |                     |                     |                     |                     |               |             |               |
| Bias                                       | 0.015               | 0.022               | 0.021               | 0.022               | 0.040               | 0.028               | -0.005        |             |               |
| ESE                                        | 0.166               | 0.260               | 0.334               | 0.303               | 0.300               | 0.408               | 0.042         |             |               |
| SE                                         | 0.166               | 0.259               | 0.326               | 0.297               | 0.290               | 0.401               | 0.043         |             |               |
| CP                                         | 0.949               | 0.956               | 0.944               | 0.949               | 0.950               | 0.948               | 0.951         |             |               |
| <i>Combined cohorts with no censoring</i>  |                     |                     |                     |                     |                     |                     |               |             |               |
| Bias                                       | 0.014               | 0.021               | 0.023               | 0.021               | 0.034               | 0.016               | -0.005        | 0.011       | -0.044        |
| ESE                                        | 0.160               | 0.259               | 0.329               | 0.295               | 0.284               | 0.161               | 0.037         | 0.506       | 0.252         |
| SE                                         | 0.159               | 0.255               | 0.321               | 0.285               | 0.273               | 0.157               | 0.037         | 0.618       | 0.260         |
| CP                                         | 0.950               | 0.956               | 0.944               | 0.950               | 0.950               | 0.944               | 0.950         | 0.979       | 0.965         |
| RE                                         | 1.100               | 1.023               | 1.068               | 1.052               | 1.078               | 6.267               | 1.283         |             |               |
| <i>Combined cohorts with 15% censoring</i> |                     |                     |                     |                     |                     |                     |               |             |               |
| Bias                                       | 0.000               | 0.020               | -0.008              | 0.027               | 0.025               | 0.008               | -0.003        | 0.006       | -0.060        |
| ESE                                        | 0.153               | 0.257               | 0.328               | 0.301               | 0.283               | 0.161               | 0.037         | 0.496       | 0.253         |
| SE                                         | 0.160               | 0.256               | 0.321               | 0.285               | 0.274               | 0.162               | 0.038         | 0.616       | 0.261         |
| CP                                         | 0.954               | 0.946               | 0.937               | 0.937               | 0.948               | 0.943               | 0.949         | 0.982       | 0.958         |
| RE                                         | 1.196               | 1.041               | 1.041               | 1.023               | 1.094               | 6.399               | 1.298         |             |               |
| <i>Combined cohorts with 30% censoring</i> |                     |                     |                     |                     |                     |                     |               |             |               |
| Bias                                       | 0.000               | 0.017               | 0.004               | 0.012               | 0.027               | 0.013               | -0.005        | 0.031       | -0.056        |
| ESE                                        | 0.160               | 0.245               | 0.316               | 0.289               | 0.271               | 0.165               | 0.036         | 0.556       | 0.246         |
| SE                                         | 0.159               | 0.255               | 0.320               | 0.283               | 0.274               | 0.169               | 0.038         | 0.676       | 0.261         |
| CP                                         | 0.945               | 0.954               | 0.947               | 0.945               | 0.949               | 0.955               | 0.966         | 0.976       | 0.970         |
| RE                                         | 1.108               | 1.118               | 1.113               | 1.066               | 1.156               | 5.767               | 1.273         |             |               |

Table S2: Simulation results for estimating the baseline intensities with incident cohort data only ( $m_1 = 600$ ) or with the combined cohort ( $m_1 = 600$  and  $m_2 = 600$ ) under different censoring rates for the prevalent cohort. For the results of the combined cohort, the results for the parameters in  $g(w)$  are also provided, where  $g(w) = \eta \kappa t^{\kappa-1} e^{-\eta t^\kappa}$  with  $\eta = 0.5$  and  $\kappa = 1.2$ .

|                                            | $\log \lambda_{01}$ | $\log \lambda_{03}$ | $\log \lambda_{10}$ | $\log \lambda_{12}$ | $\log \lambda_{13}$ | $\log \lambda_{23}$ | $\log \gamma$ | $\log \eta$ | $\log \kappa$ |
|--------------------------------------------|---------------------|---------------------|---------------------|---------------------|---------------------|---------------------|---------------|-------------|---------------|
| Truth                                      | -0.693              | -1.609              | -0.916              | -1.204              | -0.916              | -1.204              | 0.405         | -0.693      | 0.182         |
| <i>Incident cohort only</i>                |                     |                     |                     |                     |                     |                     |               |             |               |
| Bias                                       | 0.009               | 0.014               | 0.016               | 0.011               | 0.019               | 0.025               | -0.004        |             |               |
| ESE                                        | 0.117               | 0.179               | 0.226               | 0.206               | 0.198               | 0.285               | 0.029         |             |               |
| SE                                         | 0.117               | 0.182               | 0.228               | 0.208               | 0.202               | 0.275               | 0.031         |             |               |
| CP                                         | 0.954               | 0.953               | 0.949               | 0.957               | 0.949               | 0.957               | 0.955         |             |               |
| <i>Combined cohorts with no censoring</i>  |                     |                     |                     |                     |                     |                     |               |             |               |
| Bias                                       | 0.009               | 0.014               | 0.016               | 0.010               | 0.016               | 0.010               | -0.004        | 0.043       | -0.011        |
| ESE                                        | 0.111               | 0.176               | 0.225               | 0.197               | 0.191               | 0.110               | 0.026         | 0.371       | 0.171         |
| SE                                         | 0.112               | 0.178               | 0.225               | 0.199               | 0.191               | 0.111               | 0.027         | 0.418       | 0.182         |
| CP                                         | 0.954               | 0.957               | 0.950               | 0.957               | 0.946               | 0.952               | 0.953         | 0.975       | 0.974         |
| RE                                         | 1.091               | 1.034               | 1.009               | 1.094               | 1.089               | 6.682               | 1.238         |             |               |
| <i>Combined cohorts with 15% censoring</i> |                     |                     |                     |                     |                     |                     |               |             |               |
| Bias                                       | 0.007               | 0.010               | 0.018               | 0.011               | 0.019               | 0.005               | -0.004        | 0.060       | -0.011        |
| ESE                                        | 0.113               | 0.186               | 0.221               | 0.203               | 0.188               | 0.113               | 0.027         | 0.373       | 0.177         |
| SE                                         | 0.112               | 0.178               | 0.225               | 0.199               | 0.190               | 0.115               | 0.027         | 0.423       | 0.182         |
| CP                                         | 0.952               | 0.940               | 0.948               | 0.938               | 0.943               | 0.946               | 0.945         | 0.974       | 0.961         |
| RE                                         | 1.073               | 0.970               | 1.036               | 1.009               | 1.090               | 6.247               | 1.150         |             |               |
| <i>Combined cohorts with 30% censoring</i> |                     |                     |                     |                     |                     |                     |               |             |               |
| Bias                                       | 0.003               | 0.021               | 0.015               | 0.010               | 0.005               | 0.004               | -0.003        | 0.045       | -0.014        |
| ESE                                        | 0.116               | 0.182               | 0.233               | 0.195               | 0.190               | 0.125               | 0.028         | 0.395       | 0.181         |
| SE                                         | 0.113               | 0.180               | 0.225               | 0.199               | 0.191               | 0.120               | 0.027         | 0.438       | 0.184         |
| CP                                         | 0.945               | 0.945               | 0.940               | 0.959               | 0.950               | 0.926               | 0.930         | 0.973       | 0.959         |
| RE                                         | 1.039               | 0.980               | 0.933               | 1.104               | 1.073               | 5.197               | 1.081         |             |               |

Table S3: Simulation results with the combined cohort ( $m_1 = 300$  and  $m_2 = 300$ ) when the density of  $\tilde{W}$  is incorrectly specified. Two misspecified cases are considered: (1)  $g(w) = \eta e^{-\eta t}$  (*Exponential distribution*) and (2)  $g(w) = 1/\tau$  with  $\tau = 10$  (*Length-biased sampling*). The prevalent cohort data are generated with a Weibull density of  $\tilde{W}$  with 30% censoring rates, where  $g(w) = \eta \kappa t^{\kappa-1} e^{-\eta t^\kappa}$  with  $\eta = 0.5$  and  $\kappa = 1.2$ .

|                                                                                                 | $\log \alpha_{01}$ | $\log \alpha_{03}$ | $\log \alpha_{10}$ | $\log \alpha_{12}$ | $\log \alpha_{13}$ | $\log \alpha_{23}$ | $\log \gamma$ | $\beta_{01}^{(1)}$ | $\beta_{01}^{(2)}$ | $\beta_{03}^{(1)}$ | $\beta_{03}^{(2)}$ | $\beta_{10}^{(1)}$ | $\beta_{10}^{(2)}$ | $\beta_{12}^{(1)}$ | $\beta_{12}^{(2)}$ | $\beta_{13}^{(1)}$ | $\beta_{13}^{(2)}$ | $\beta_{23}^{(1)}$ | $\beta_{23}^{(2)}$ |
|-------------------------------------------------------------------------------------------------|--------------------|--------------------|--------------------|--------------------|--------------------|--------------------|---------------|--------------------|--------------------|--------------------|--------------------|--------------------|--------------------|--------------------|--------------------|--------------------|--------------------|--------------------|--------------------|
| TRUE                                                                                            | -0.693             | -1.609             | -0.916             | -1.204             | -0.916             | -1.204             | 0.405         | 0.200              | -0.200             | 0.100              | -0.200             | -0.200             | 0.200              | 0.200              | -0.300             | 0.200              | 0.200              | 0.300              | -0.200             |
| <i>Case I: the density of <math>\tilde{W}</math> is misspecified (Exponential distribution)</i> |                    |                    |                    |                    |                    |                    |               |                    |                    |                    |                    |                    |                    |                    |                    |                    |                    |                    |                    |
| Bias                                                                                            | -0.018             | -0.050             | -0.066             | -0.063             | -0.061             | -0.074             | 0.027         | -0.001             | -0.012             | 0.001              | 0.046              | -0.006             | -0.015             | -0.014             | -0.002             | -0.017             | 0.011              | 0.007              | 0.007              |
| ESE                                                                                             | 0.184              | 0.289              | 0.401              | 0.342              | 0.326              | 0.166              | 0.035         | 0.171              | 0.687              | 0.285              | 1.182              | 0.401              | 1.588              | 0.311              | 1.331              | 0.299              | 1.27               | 0.127              | 0.526              |
| SE                                                                                              | 0.177              | 0.284              | 0.383              | 0.334              | 0.315              | 0.167              | 0.035         | 0.164              | 0.698              | 0.277              | 1.139              | 0.380              | 1.558              | 0.308              | 1.319              | 0.282              | 1.205              | 0.126              | 0.536              |
| CP                                                                                              | 0.939              | 0.943              | 0.948              | 0.944              | 0.942              | 0.930              | 0.851         | 0.939              | 0.951              | 0.954              | 0.944              | 0.949              | 0.960              | 0.959              | 0.949              | 0.943              | 0.943              | 0.950              | 0.962              |
| <i>Case II: the density of <math>\tilde{W}</math> is misspecified (Length-biased sampling)</i>  |                    |                    |                    |                    |                    |                    |               |                    |                    |                    |                    |                    |                    |                    |                    |                    |                    |                    |                    |
| Bias                                                                                            | 0.025              | -0.006             | -0.074             | 0.025              | 0.033              | -0.007             | 0.033         | -0.005             | -0.016             | -0.013             | 0.041              | -0.005             | -0.012             | -0.034             | -0.011             | -0.040             | 0.000              | -0.015             | 0.034              |
| ESE                                                                                             | 0.180              | 0.291              | 0.406              | 0.337              | 0.321              | 0.152              | 0.035         | 0.171              | 0.684              | 0.290              | 1.199              | 0.404              | 1.606              | 0.310              | 1.332              | 0.295              | 1.264              | 0.110              | 0.451              |
| SE                                                                                              | 0.175              | 0.288              | 0.387              | 0.330              | 0.308              | 0.154              | 0.035         | 0.163              | 0.695              | 0.282              | 1.160              | 0.384              | 1.574              | 0.307              | 1.319              | 0.280              | 1.198              | 0.110              | 0.465              |
| CP                                                                                              | 0.941              | 0.947              | 0.950              | 0.942              | 0.935              | 0.954              | 0.822         | 0.933              | 0.949              | 0.960              | 0.944              | 0.951              | 0.959              | 0.959              | 0.948              | 0.943              | 0.941              | 0.950              | 0.959              |

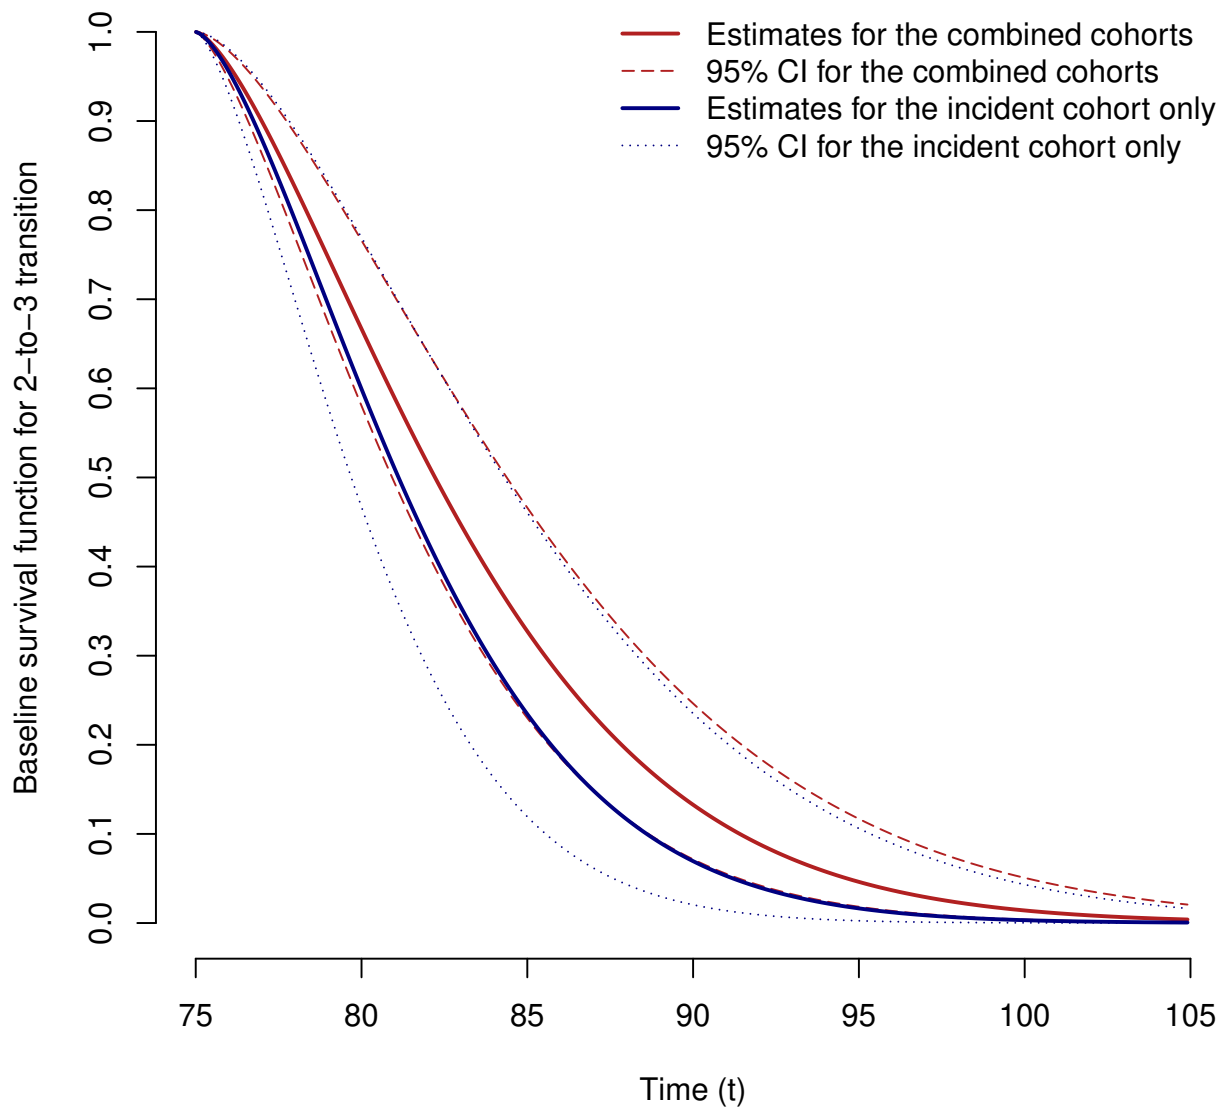

Figure S1: Flow diagram of the Nun Study that consists of both incident cohort data ( $m_1 = 424$ ) and prevalent cohort data ( $m_2 = 77$ ).

Table S4: Estimates of the baseline intensities and the parameters for  $A_0$  in the Nun Study by using the combined cohorts or the incident cohort only.

|                                  | $\log \lambda_{01}$ | $\log \lambda_{03}$ | $\log \lambda_{10}$ | $\log \lambda_{12}$ | $\log \lambda_{13}$ | $\log \lambda_{23}$ | $\log \gamma$ | $\log \eta$ |
|----------------------------------|---------------------|---------------------|---------------------|---------------------|---------------------|---------------------|---------------|-------------|
| <i>Combined cohorts data</i>     |                     |                     |                     |                     |                     |                     |               |             |
| Estimate                         | -1.571              | -6.509              | -3.907              | -4.505              | -5.054              | -3.256              | 0.380         | 0.284       |
| SE                               | 0.311               | 0.538               | 0.434               | 0.263               | 0.354               | 0.222               | 0.033         | 0.334       |
| <i>Incident cohort data only</i> |                     |                     |                     |                     |                     |                     |               |             |
| Estimate                         | -1.672              | -6.603              | -4.010              | -4.574              | -5.265              | -3.087              | 0.407         |             |
| SE                               | 0.324               | 0.530               | 0.448               | 0.282               | 0.404               | 0.292               | 0.036         |             |

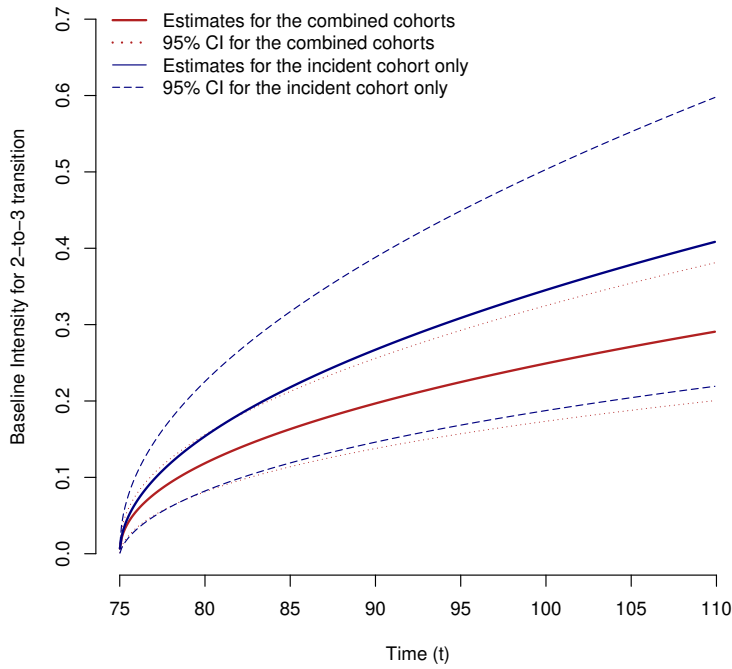

Figure S2: The estimated baseline intensities for the 2-3 transitions with the pointwise 95% confidence intervals, obtained from the combined cohort data (red) and the incident cohort data (blue) of the Nun Study.
